# Supplementary material for: miRNAs regulate acute transcriptional changes in broiler embryos in response to modification of incubation temperature
Source: Springer Nature journal article supplement (doi:10.1038/s41598-018-29316-7), 2018-07-23
Supplement: MOESM1 [file 41598_2018_29316_MOESM1_ESM.pdf]

**miRNAs regulate acute transcriptional changes in broiler embryos in response to  
modification of incubation temperature**

**Watcharapong Naraballoh<sup>1</sup>, Nares Trakooljul<sup>1</sup>, Eduard Murani<sup>1</sup>, Carsten Kirschek<sup>2</sup>,  
Sabine Janisch<sup>3</sup>, Michael Wicke<sup>3†</sup>, Siriluck Ponsuksili<sup>1</sup>, Klaus Wimmers<sup>1\*</sup>**

**Supplementary Material**

**Table S1. Composition of feed stuff for broilers at respective phases**

| Feeding phase     | Starter<br>until day 14 | Grower<br>until day 28 | Finisher<br>until day 35 |
|-------------------|-------------------------|------------------------|--------------------------|
| Energy (MJ ME/kg) | 12.4                    | 12.6                   | 12.7                     |
| Crude protein (%) | 22                      | 20                     | 18                       |
| Methionine (%)    | 1.33                    | 0.45                   | 0.4                      |
| Lysine(%)         | 1.33                    | 1.15                   | 1.00                     |
| Calcium (%)       | 0.90                    | 0.85                   | 0.80                     |

**Table S2. Primers used for quantitative real time PCR**

| <b>miRNA</b> | <b>Primer sequence</b> |
|--------------|------------------------|
| gga-miR-199  | GTACAGTAGTCTGCACATTGG  |
| gga-miR-30d  | TGTAAACATCCCCGACTGGA   |
| gga-miR-460a | CCTGCATTGTACACACTGTG   |
| gga-miR-100  | AACCCGTAGATCCGAACTTGT  |
| gga-miR-133a | TTTGGTCCCCTTCAACCAGCT  |
| gga-miR-222  | GAGCTACATCTGGCTACTGG   |

1 **Table S3.** Summary of significant biological functions ( $p < 0.05$ ) of target mRNAs that are related to differentially expressed miRNAs for H10  
 2 treatment in embryonic breast and hind muscle tissues

| Major category                                                    | Ingenuity biofunction                    | BH $p$ -value | Z-score | Top 10 genes                                                                            | Differentially expressed miRNAs                                                                                                                               |
|-------------------------------------------------------------------|------------------------------------------|---------------|---------|-----------------------------------------------------------------------------------------|---------------------------------------------------------------------------------------------------------------------------------------------------------------|
| <b>Breast H10</b>                                                 |                                          |               |         |                                                                                         |                                                                                                                                                               |
| Cell maintenance, proliferation, differentiation, and replacement | Formation of actin filaments             | 1.58E-02      | -0.728  | <i>ARHGAP18, CDC42BPB, KIRREL, MYH11, NFATC1, PECAMI, PHLDB2, PIK3R1, PPF1A1, ROCK1</i> | miR-1825, miR-222, miR-739, miR-133, miR-133a-star, miR-17-3p, miR-2970, miR-971, miR-130c, miR-145, miR-363, miR-199a-3p, miR-460-5p, miR-1281, miR-212-star |
|                                                                   | Formation of cytoskeleton                | 1.93E-02      | -0.673  |                                                                                         |                                                                                                                                                               |
|                                                                   | Interphase                               | 1.09E-02      | 0.984   | <i>CDKN1B, AKAP12, IL15, PIK3R1, SYK, TCF3, USP8, XRCC5, ADNP, ARFIP2</i>               | miR-222, miR-289, miR-460-5p, miR-199a-3p, miR-212-star, miR-739, miR-578, miR-5109, miR-138, miR-1825, miR-133                                               |
|                                                                   | Proliferation of activated T lymphocytes | 1.26E-02      | 1.446   |                                                                                         |                                                                                                                                                               |
|                                                                   | Proliferation of thymocytes              | 3.06E-02      | 1.715   |                                                                                         |                                                                                                                                                               |
|                                                                   | Organization of cytoskeleton             | 9.72E-03      | 1.874   |                                                                                         |                                                                                                                                                               |
|                                                                   | Organization of cytoplasm                | 1.47E-02      | 1.874   |                                                                                         |                                                                                                                                                               |
| Organismal, organ, and tissue development                         | Organismal death                         | 8.66E-03      | -5.151  | <i>ADNP, BPTF, CUL1, FBN2, HOXA3, JPH1, MYH11, PLXNB2, SLC25A25, TRIM33</i>             | miR-222, miR-289, miR-460-5p, miR-1825, miR-971, let-7, miR-4530, miR-5109, miR-667-star                                                                      |
|                                                                   | Quantity of double-positive thymocyte    | 2.38E-02      | 0.128   | <i>CDKN1B, KMT2E, NFATC1, TCF3, TPP2, F3, GUCY1A3, KLF5, SYK, CSPG4</i>                 | miR-222, miR-5109, miR-138, miR-3017a, miR-460-5p, miR-289, miR-1825, miR-4530, miR-130c, miR-145, miR-363, miR-133                                           |
|                                                                   | Formation of neointima                   | 2.13E-03      | 0.152   |                                                                                         |                                                                                                                                                               |
|                                                                   | Quantity of double-negative T lymphocyte | 8.92E-03      | 0.447   |                                                                                         |                                                                                                                                                               |
|                                                                   | Vasculogenesis                           | 3.17E-02      | 0.882   |                                                                                         |                                                                                                                                                               |
|                                                                   | Thermogenesis                            | 2.89E-02      | 1       |                                                                                         |                                                                                                                                                               |
| Nutrient metabolism                                               | Synthesis of polysaccharide              | 1.73E-02      | 0.447   | <i>CHPF, CHST3, CX3CL1, GALNT5, GBE1, GPAM, PPP1R3B, PPP1R3C, ZFPM2, ADRB2</i>          | miR-199a-3p, miR-212-star, miR-460-5p, miR-5109, miR-133, miR-133a-star, miR-147, miR-2970, miR-1281, miR-667-star, miR-199-star, miR-289                     |
|                                                                   | Metabolism of polysaccharide             | 1.86E-02      | 0.816   |                                                                                         |                                                                                                                                                               |
|                                                                   | Synthesis of carbohydrate                | 3.68E-02      | 1.807   |                                                                                         |                                                                                                                                                               |
|                                                                   | Metabolism of phosphatidylinositol       | 1.89E-02      | 1.91    |                                                                                         |                                                                                                                                                               |

|                                                                   |                                    |          |        |                                                                                  |                                                                                                                                  |
|-------------------------------------------------------------------|------------------------------------|----------|--------|----------------------------------------------------------------------------------|----------------------------------------------------------------------------------------------------------------------------------|
| Genetic information and nucleic acid processing                   | Transcription of DNA               | 2.11E-02 | 0.313  | <i>ADRB2, XPO1, ABRA, BACH1, CDKN1B, DCP1A, HOXC8, ILF2, JMJD1C, KDM7A</i>       | miR-5109, miR-199a-3p, miR-212-star, miR-460-5p, miR-289, miR-222, miR-133, miR-3148, miR-93, miR-1825, miR-4530                 |
|                                                                   | Hydrolysis of nucleotide           | 1.71E-02 | 1.941  |                                                                                  |                                                                                                                                  |
| Cell signaling and interaction                                    | Response of helper T lymphocytes   | 1.62E-02 | -1     | <i>CD276, NFATC1, NFATC2, PIK3R1</i>                                             | miR-133, miR-130c, miR-145, miR-363, miR-1563, miR-17-3p, miR-2970, miR-425-5p, miR-739                                          |
|                                                                   | Hydrolysis of GTP                  | 1.07E-02 | 1.4    | <i>ADRB2, ARHGAP10, ARHGAP5, RANBP2, XPO1</i>                                    | miR-199a-3p, miR-212-star, miR-460-5p, miR-222, miR-1825, miR-289, miR-4530                                                      |
| Response to stimuli                                               | Adhesion of monocytes              | 1.84E-02 | 0.623  | <i>CX3CL1, F3, IL15, ROCK1</i>                                                   | miR-460-5p, miR-5109, miR-138, miR-212-star                                                                                      |
| <b>Hind H10</b>                                                   |                                    |          |        |                                                                                  |                                                                                                                                  |
| Cell maintenance, proliferation, differentiation, and replacement | Formation of cytoskeleton          | 0.0275   | -1.172 | <i>ARHGAP18, DLC1, MYH11, PIK3R1, PPF1A1, ROCK1, AKAP11, TRAF6, MTM1, ACTA1</i>  | miR-222a-star, miR-1915, miR-199a-5p, miR-4454, miR-4592, miR-638, miR-64b, miR-2861, miR-3960, miR-3885-5p                      |
|                                                                   | Development of cytoplasm           | 0.0379   | -1.172 |                                                                                  |                                                                                                                                  |
|                                                                   | Formation of actin stress fibers   | 0.0181   | -0.849 |                                                                                  |                                                                                                                                  |
|                                                                   | Formation of filaments             | 0.0065   | -0.342 | <i>AKAP11, ARHGAP5, CELSR1, DLC1, IQGAP1, MTM1, MTUS1, PDZD8, PIK3R1, PLXNB2</i> | miR-1915, miR-199a-5p, miR-4454, miR-4592, miR-638, miR-64b, miR-1207-5p, miR-22-star, miR-4689, miR-3885-5p, miR-2861, miR-3960 |
|                                                                   | Organization of cytoplasm          | 0.0347   | 1.219  |                                                                                  |                                                                                                                                  |
|                                                                   | Organization of cytoskeleton       | 0.049    | 1.219  |                                                                                  |                                                                                                                                  |
| Organismal, organ, and tissue development                         | Perinatal death                    | 0.0407   | -3.39  | <i>AKAP6, ARHGAP5, ARID4B, HPGD, KMT2E, MAN2A1, MTM1, MYH11, PIK3R1, RAB3C</i>   | miR-212, miR-199a-5p, miR-3885-5p, miR-4592, miR-2861, miR-3960, miR-638, miR-1915, miR-4454                                     |
|                                                                   | Size of body                       | 0.00111  | 3.567  | <i>ACTA1, AKAP6, ARHGAP5, ARID4B, CHD7, CUL4B, GAMT, GPAM, ITSN1, KCNJ16</i>     | miR-222a-star, miR-212, miR-199a-5p, miR-3885-5p, miR-1915, miR-638, miR-2861                                                    |
| Nutrient metabolism                                               | Concentration of phosphatidic acid | 0.0069   | 0.532  | <i>MTM1, FIG4, GPAM, MGLL, NT5E, PIK3R1, PLCB1, PNPLA8</i>                       | miR-425-5p, miR-638, miR-199a-5p, miR-212, miR-2861, miR-3960, miR-4592, miR-222                                                 |
|                                                                   | Hydrolysis of carbohydrate         | 0.0411   | 1.972  |                                                                                  |                                                                                                                                  |
| Genetic information and nucleic acid processing                   | Phosphorylation of protein         | 0.0124   | 0.896  | <i>N4BP2, AKAP11, AKAP6, ARHGAP5, CCDC88C, CD7, CDKL5, CPNE3, EEF2K, FZD1</i>    | miR-1915, miR-199a-5p, miR-4454, miR-4592, miR-638, miR-212, miR-4689, miR-222, miR-1207-5p, miR-22-star                         |
|                                                                   | Hydrolysis of nucleotide           | 0.0377   | 1.067  |                                                                                  |                                                                                                                                  |

3

4

5 **Table S4.** Summary of significant biological functions ( $p < 0.05$ ) of target mRNAs that are related to differentially expressed miRNAs for L13  
6 treatment in embryonic breast and hind muscle tissues

| Major category                                                    | Ingenuity biofunction                  | BH $p$ -value | Z-score | Top 10 genes                                                                    | Differentially expressed miRNAs                                                                                                                                      |
|-------------------------------------------------------------------|----------------------------------------|---------------|---------|---------------------------------------------------------------------------------|----------------------------------------------------------------------------------------------------------------------------------------------------------------------|
| <b>Breast EmL13</b>                                               |                                        |               |         |                                                                                 |                                                                                                                                                                      |
| Cell maintenance, proliferation, differentiation, and replacement | Outgrowth of neurites                  | 0.0131        | -1.506  | <i>CD226, CD80, LRRC8A, NOTCH2, PATZ1, PRKCQ, RUNX2, TCF3, PTGS1, SRF</i>       | miR-92a, miR-4900a, miR-344d-2-star, let-7, miR-93, miR-1677, miR-222, miR-4651, miR-762, miR-92b, miR-1908, miR-2436-5p, miR-460-5p, miR-130c, miR-199b, miR-312-5p |
|                                                                   | Differentiation of T lymphocytes       | 0.0215        | -0.294  |                                                                                 |                                                                                                                                                                      |
|                                                                   | Homeostasis of leukocytes              | 0.0176        | -0.156  |                                                                                 |                                                                                                                                                                      |
|                                                                   | T cell development                     | 0.0214        | -0.125  |                                                                                 |                                                                                                                                                                      |
|                                                                   | Engulfment of leukocytes               | 0.0029        | 1.664   | <i>MIF, DNMI, SOATI, TICAMI, CLIC4, CTNND1, JAM3, PICK1, RNF2, SRF</i>          | miR-5109, miR-2016, let-7, miR-1, miR-17-3p, miR-302a, miR-93, miR-124, miR-1908, miR-222, miR-460-5p, miR-92a, miR-30e, miR-263a-star, miR-1270, miR-199b, miR-4651 |
|                                                                   | Formation of cells                     | 0.0143        | 1.709   |                                                                                 |                                                                                                                                                                      |
|                                                                   | Homing                                 | 0.0251        | 1.947   |                                                                                 |                                                                                                                                                                      |
|                                                                   | Proliferation of splenocytes           | 0.0042        | 2       |                                                                                 |                                                                                                                                                                      |
| Engulfment of cells                                               | 0.0060                                 | 2.008         |         |                                                                                 |                                                                                                                                                                      |
| Organismal, organ, and tissue development                         | Organismal death                       | 0.0004        | -4.096  | <i>AMER1, RUNX2, ARHGAP1, ARID1A, DHCR7, DNMI, INPP5E, PIP5K1C, PTGS1, TCF3</i> | miR-93, let-7, miR-199b, miR-1, miR-17-3p, miR-302a, miR-1908, miR-2436-5p, miR-460-5p, miR-762, miR-92b, miR-130c, miR-312-5p                                       |
|                                                                   | Perinatal death                        | 0.0116        | -2.926  |                                                                                 |                                                                                                                                                                      |
|                                                                   | Neonatal death                         | 0.0077        | -2.578  |                                                                                 |                                                                                                                                                                      |
|                                                                   | Size of bone                           | 0.0117        | -1.673  |                                                                                 |                                                                                                                                                                      |
|                                                                   | Accumulation of leukocytes             | 0.0235        | 1.744   | <i>CD80, NOTCH2, PRKCQ, TCF3, MIF, ARHGAP1, HIVEP3, IP6K1, RUNX2, SRF</i>       | miR-93, miR-4900a, let-7, miR-1677, miR-222, miR-4651, miR-762, miR-92a, miR-92b, miR-130c, miR-199b, miR-312-5p                                                     |
|                                                                   | Quantity of lymphatic system component | 0.0196        | 1.815   |                                                                                 |                                                                                                                                                                      |
|                                                                   | Development of body trunk              | 0.0309        | 1.964   |                                                                                 |                                                                                                                                                                      |
|                                                                   | Generation of lymphocytes              | 0.0188        | 1.987   |                                                                                 |                                                                                                                                                                      |
| Quantity of double-positive thymocyte                             | 0.0117                                 | 2             |         |                                                                                 |                                                                                                                                                                      |
| Nutrient metabolism                                               | Uptake of D-glucose                    | 0.0064        | 1.432   | <i>JUP, MIF, NTRK3, PRKAB2,</i>                                                 | miR-5109, let-7, miR-1575, miR-1908, miR-                                                                                                                            |

|                                                                   |                                     |        |       |                                                                            |                                                                                                                                                             |
|-------------------------------------------------------------------|-------------------------------------|--------|-------|----------------------------------------------------------------------------|-------------------------------------------------------------------------------------------------------------------------------------------------------------|
|                                                                   | Uptake of carbohydrate              | 0.0109 | 1.964 | <i>PRKCQ, RAPGEF1, SRF, SLC35B4</i>                                        | 2309, miR-4651, miR-762, miR-1677, miR-222, miR-92a, miR-92b, miR-2413, miR-4900a, miR-1, miR-93, miR-199b                                                  |
| Genetic information and nucleic acid processing                   | Transcription of DNA                | 0.0366 | 0.749 | <i>ARID1A, NOTCH2, RUNX2, SRF, TCF3, CRTCL1, PRKCQ, AGO1, ATNI, BCL9</i>   | let-7, miR-93, miR-3128, miR-312-5p, miR-1677, miR-222, miR-4651, miR-762, miR-92a, miR-92b, miR-130c, miR-199b                                             |
|                                                                   | Transcription of RNA                | 0.0327 | 1.137 |                                                                            |                                                                                                                                                             |
|                                                                   | Expression of RNA                   | 0.0263 | 1.445 |                                                                            |                                                                                                                                                             |
|                                                                   | Transactivation of RNA              | 0.0065 | 1.666 |                                                                            |                                                                                                                                                             |
|                                                                   | Transactivation                     | 0.0004 | 1.671 |                                                                            |                                                                                                                                                             |
| Molecular transport                                               | Transport of protein                | 0.0049 | 1.067 | <i>FRAS1, IPO9, JUP, LRP1, NDFIP2, NUP214, XPO5, XPO6, CLIC4, CLNS1A</i>   | miR-5109, miR-312-5p, miR-199-star, miR-199b, miR-2413, miR-31, miR-762, miR-93, let-7, miR-17-3p, miR2275b-5p, miR-1908, miR-4651, miR-30e, miR-263a-star  |
|                                                                   | Transport of molecule               | 0.0226 | 1.21  |                                                                            |                                                                                                                                                             |
| Cell signaling and interaction                                    | Adhesion of mononuclear leukocytes  | 0.0259 | 0.152 | <i>MIF, PIP5K1C, RALGDS, RAPGEF1, CD80, CLIC4, DNMI, IPO9, JAM3, JUP</i>   | miR-4900a, miR-5109, let-7, miR-1, miR-17-3p, miR-302a, miR-93, miR-124, miR-1908, miR-222, miR-460-5p, miR-92a, miR-2413, miR-4651, miR-762                |
|                                                                   | Adhesion of connective tissue cells | 0.0128 | 1     |                                                                            |                                                                                                                                                             |
|                                                                   | Phagocytosis by macrophages         | 0.0131 | 1     |                                                                            |                                                                                                                                                             |
|                                                                   | Adhesion of immune cells            | 0.0317 | 1.299 |                                                                            |                                                                                                                                                             |
| Response to stimuli                                               | Migration of phagocytes             | 0.0102 | 0.408 | <i>ARHGAP1, JAM3, PRKCQ, SRF, CD80, LRP1, MIF</i>                          | miR-93, miR-4900a, miR-124, miR-1908, miR-222, miR-460-5p, miR-5109, miR-92a, let-7, miR-17-3p, miR2275b-5p, miR-1677, miR-4651, miR-762, miR-92b, miR-199b |
|                                                                   | Migration of neutrophils            | 0.0117 | 1.695 |                                                                            |                                                                                                                                                             |
| <b>Hind EmL13</b>                                                 |                                     |        |       |                                                                            |                                                                                                                                                             |
| Cell maintenance, proliferation, differentiation, and replacement | Cell death                          | 0.0234 | 0.915 | <i>ADAMTS20, BLVRA, CTSG, IRS1, MKI67, OSBP2, PCMT1, PRPS1, RCAN2, SRF</i> | miR-138, miR-222, miR-132, miR-383, miR-271, miR-1245b-3p, miR-2137, miR-3042                                                                               |
|                                                                   | Apoptosis                           | 0.0085 | 1.269 |                                                                            |                                                                                                                                                             |
| Organismal, organ, and tissue development                         | Growth of connective tissue         | 0.0090 | -1    | <i>IRS1, RAPGEF1, RUNX2, SRF</i>                                           | miR-271, miR-2137, miR-130c                                                                                                                                 |
| Response to stimuli                                               | Cell movement of neutrophils        | 0.0106 | 1.701 | <i>CTSG, PRKCQ, SRF, TSC1</i>                                              | miR-138, miR-222, miR-271, miR-383                                                                                                                          |

7

8

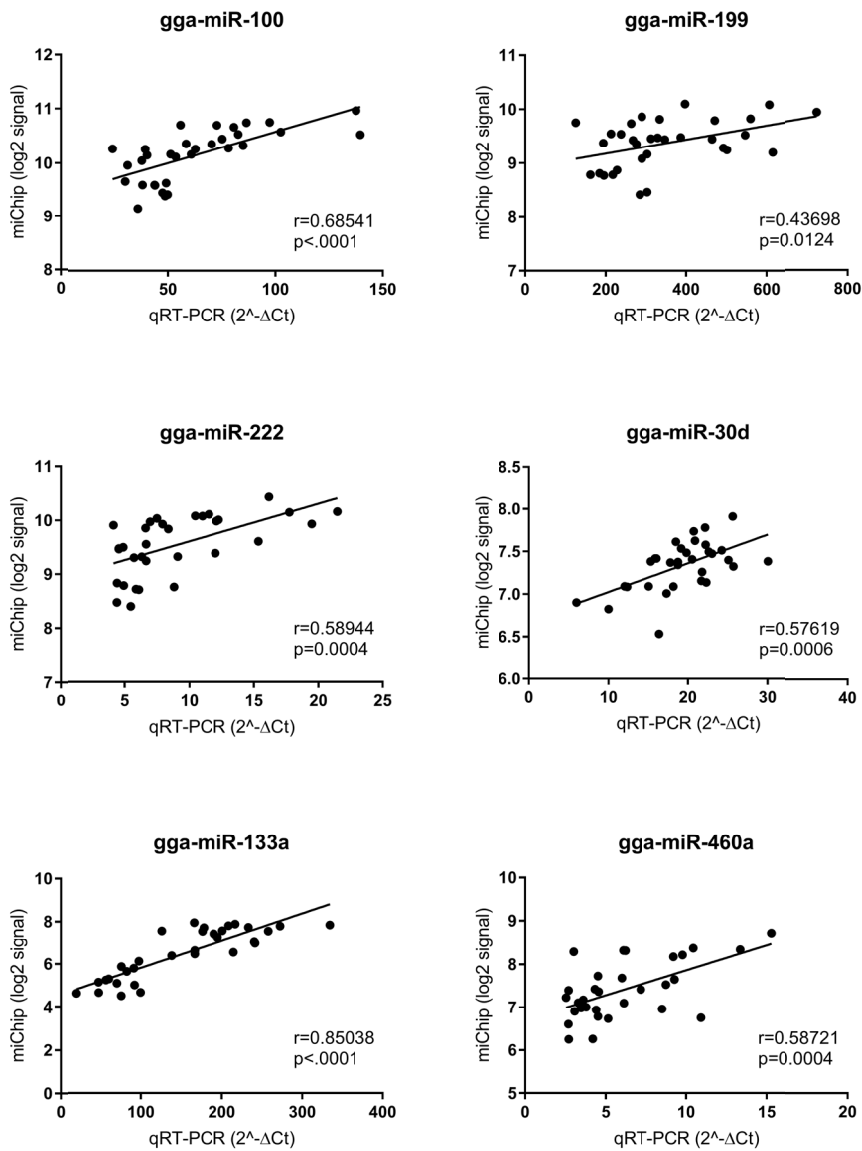

10

11 **Figure S1.** Expression levels of miRNAs obtained from the same samples of embryonic  
 12 breast muscle (n=32) by microarray and quantitative real time PCR respectively, with  
 13 Pearson correlation coefficient r and p-values.

14

15  
16  
17  
18  
19  
20  
21  
22  
23  
24  
25  
26  
27  
28  
29  
30  
31  
32  
33

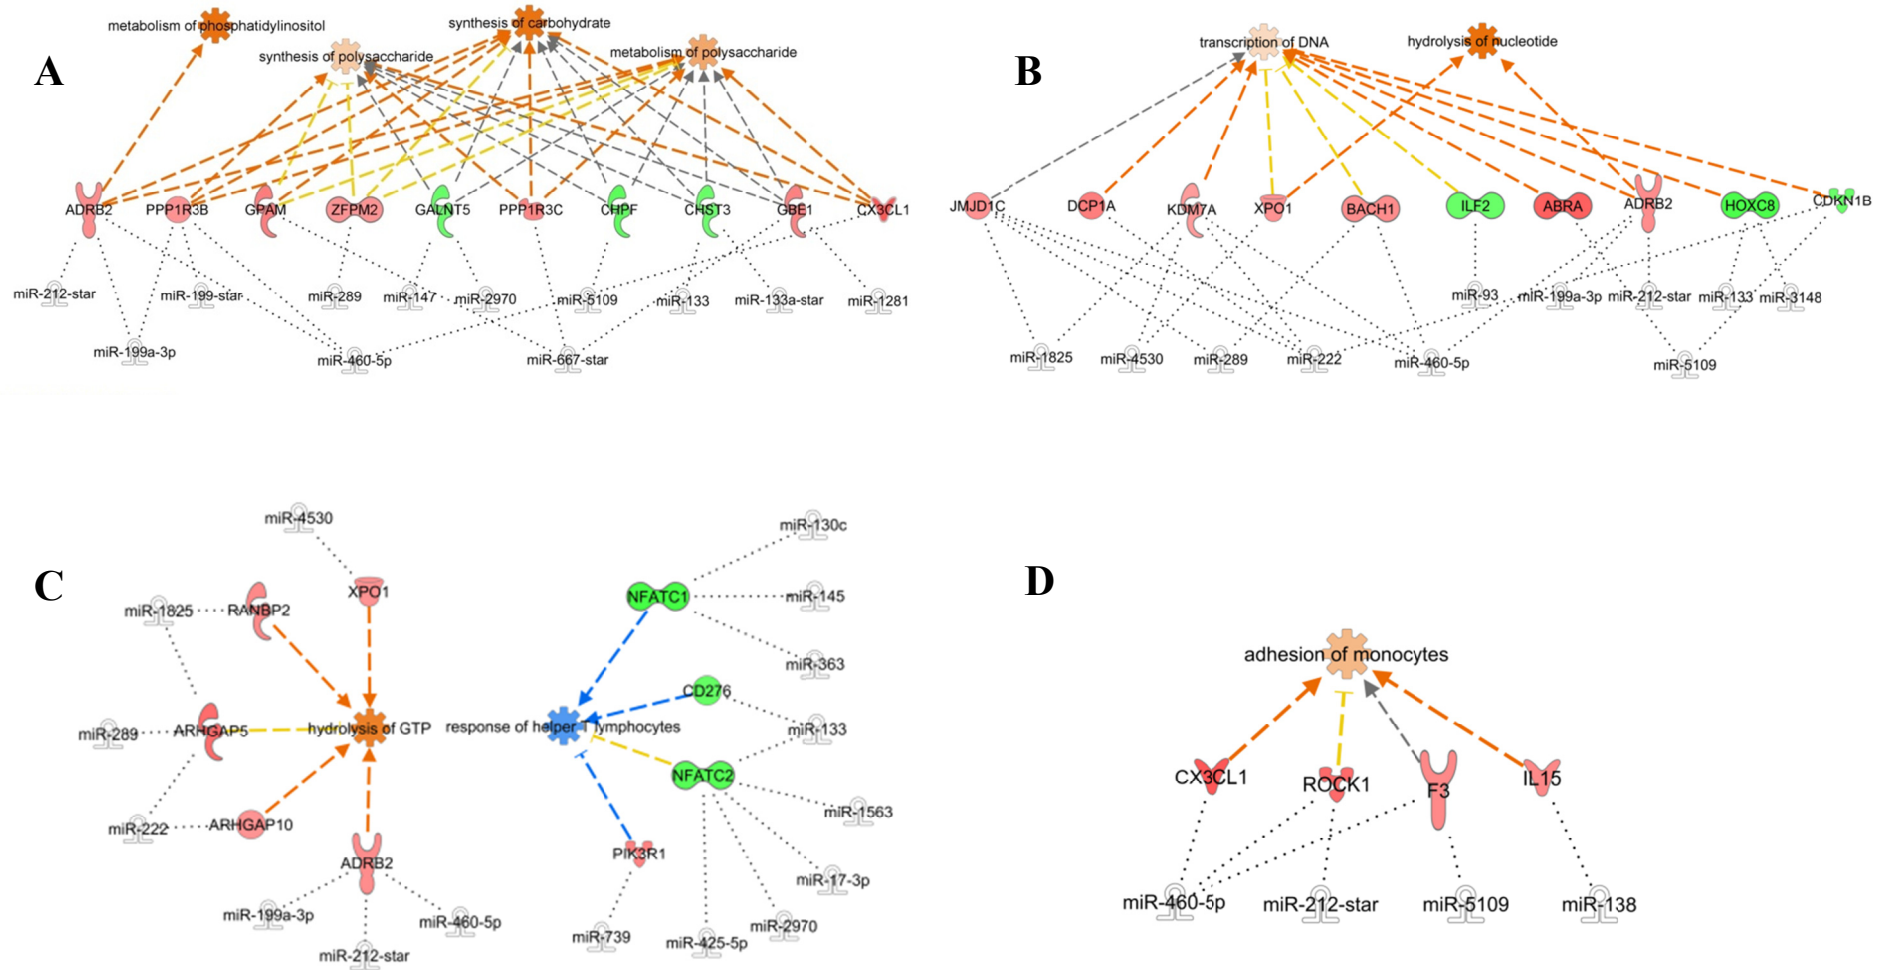

34 **Figure S2.** miRNA–mRNA regulatory networks. Representative gene regulatory networks derived from H10 treatment in breast muscle that are  
35 related to major functional categories 3 (A), 4 (B), 6 (C), and 8 (D). Activated pathways are orange, deactivated pathways are blue. The networks  
36 were generated through the use of IPA (QIAGEN Inc., <https://www.qiagenbio-informatics.com/products/ingenuity-pathway-analysis>).



37  
38  
39  
40  
41  
42  
43  
44  
45  
46  
47  
48  
49  
50  
51  
52  
53  
54  
55  
56

**A**

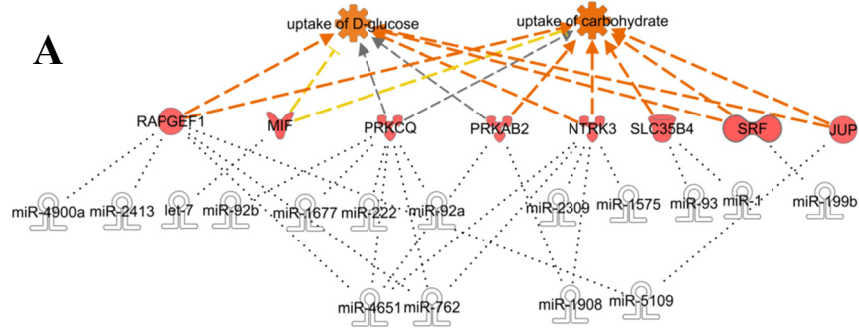

**B**

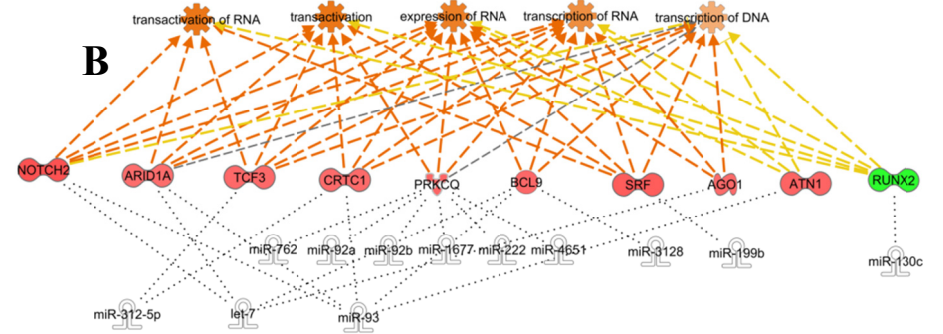

**C**

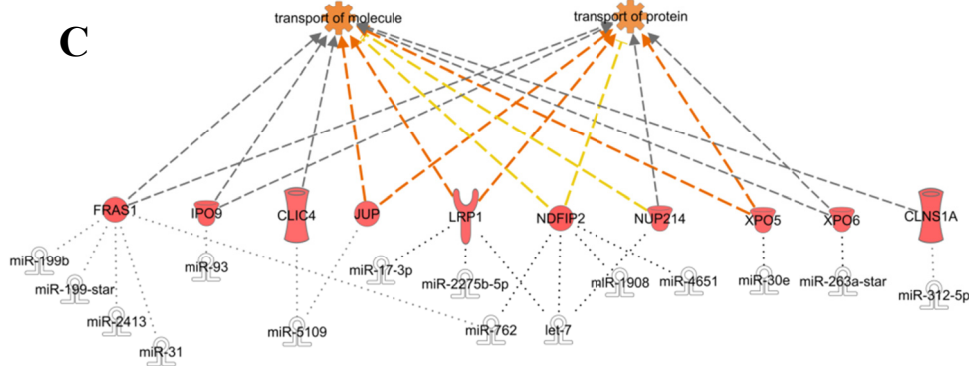

**D**

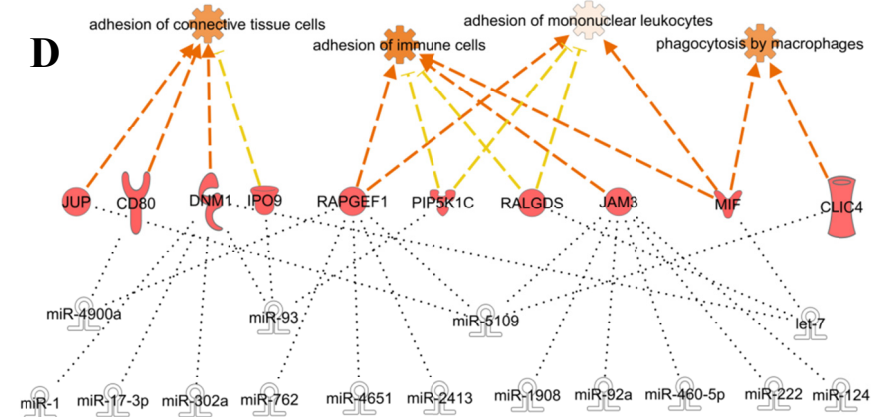

**E**

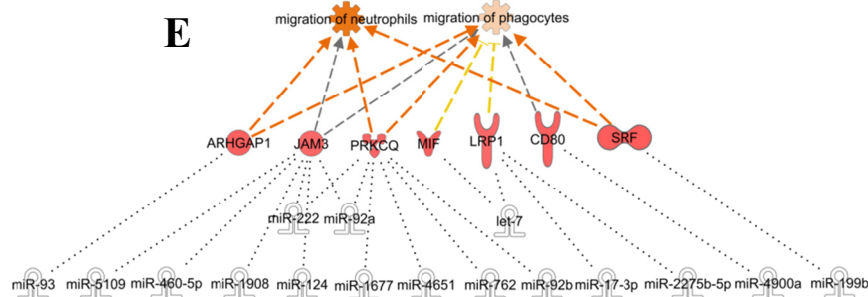

57 **Figure S3.** miRNA–mRNA regulatory networks. Representative gene regulatory networks derived from L13 treatment in breast muscle that are  
58 related to major functional categories 3 (A), 4 (B), 5 (C), 6 (D), and 8 (E). Activated pathways are orange. The networks were generated through  
59 the use of IPA (QIAGEN Inc., <https://www.qiagenbio-informatics.com/products/ingenuity-pathway-analysis>).  
60

61

62

63

64

65

66

67

68

69

70

71

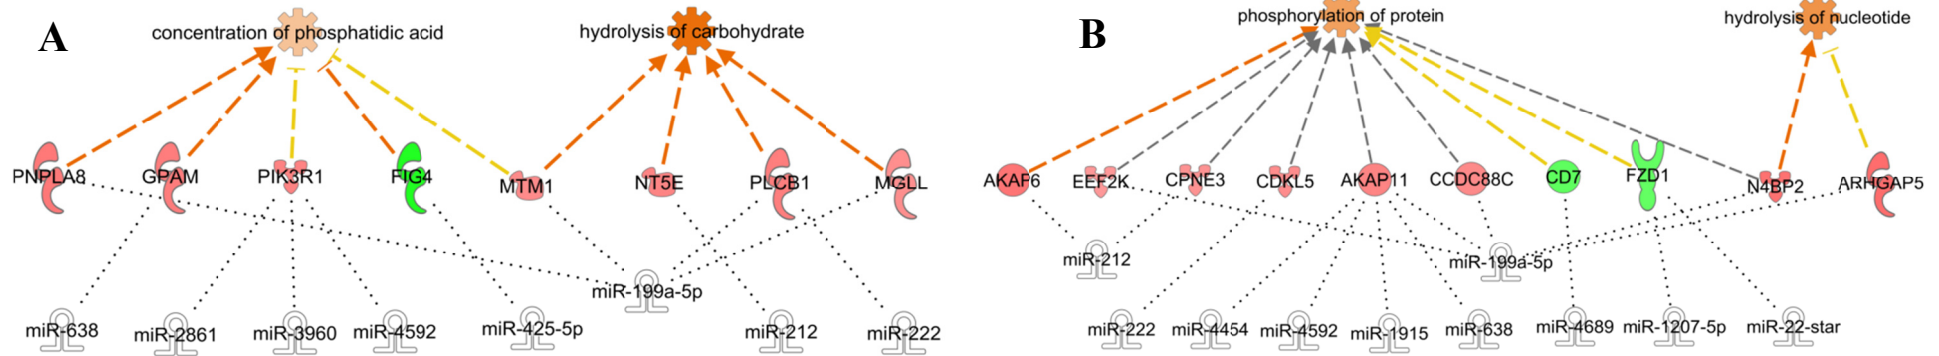

**Figure S4.** miRNA-mRNA regulatory networks. Representative gene regulatory networks derived from H10 treatment in hind muscle that are related to major functional categories 3 (A) and 4 (B). Activated pathways are orange, while deactivated pathways are blue. The networks were generated through the use of IPA (QIAGEN Inc., <https://www.qiagenbio-informatics.com/products/ingenuity-pathway-analysis>).

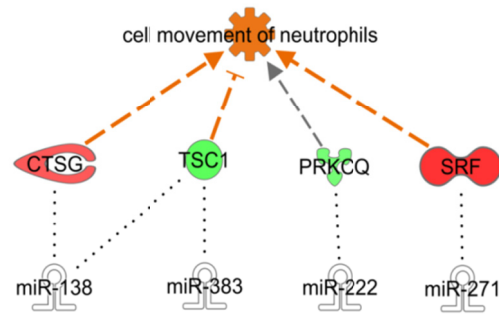

72

73 **Figure S5.** miRNA-mRNA regulatory networks. Representative gene regulatory networks derived from H10 treatment in hind muscle that are  
 74 related to major functional category 8. Activated pathways are orange. The networks were generated through the use of IPA (QIAGEN Inc.,  
 75 <https://www.qiagenbio-informatics.com/products/ingenuity-pathway-analysis>).
